# Supplementary material for: Proteomic analysis of peripheral blood mononuclear cells from OSCC patients reveals potential immune checkpoints to enable personalized treatment
Source: Royal Society of Chemistry journal article supplement (doi:10.1039/d4mo00112e), 2024-08-23
Supplement: d4mo00112e1.pdf [file d4mo00112e1.pdf]

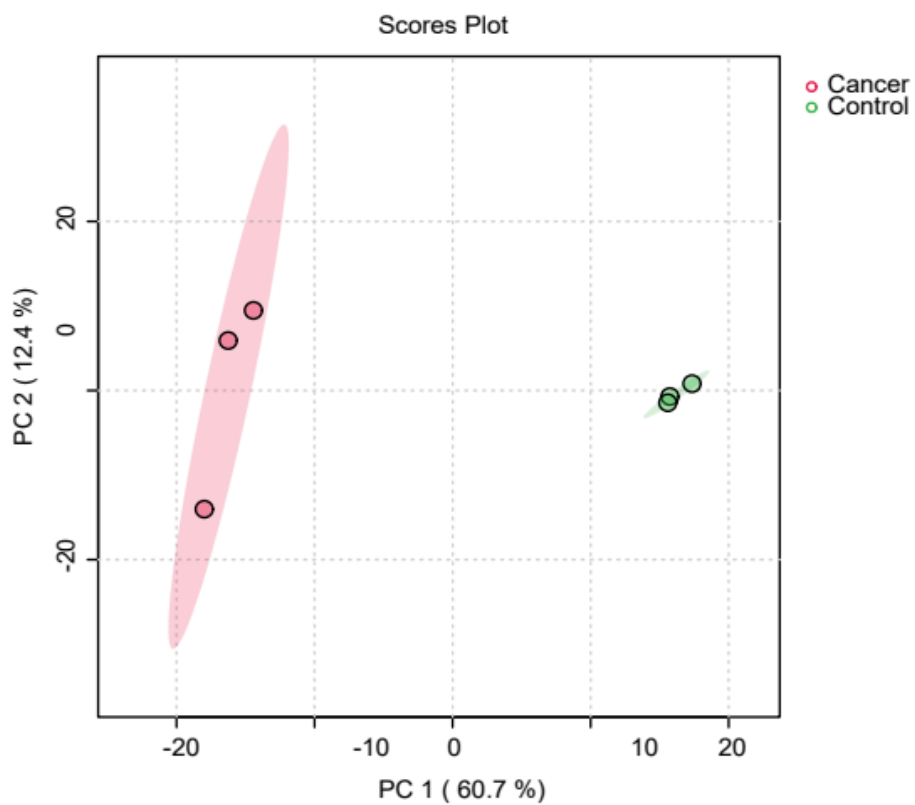

Supplementary figure S1: The principal component analysis of the proteins identified from the cancer-control samples using DIA-MS method for quantitative proteomic analysis.

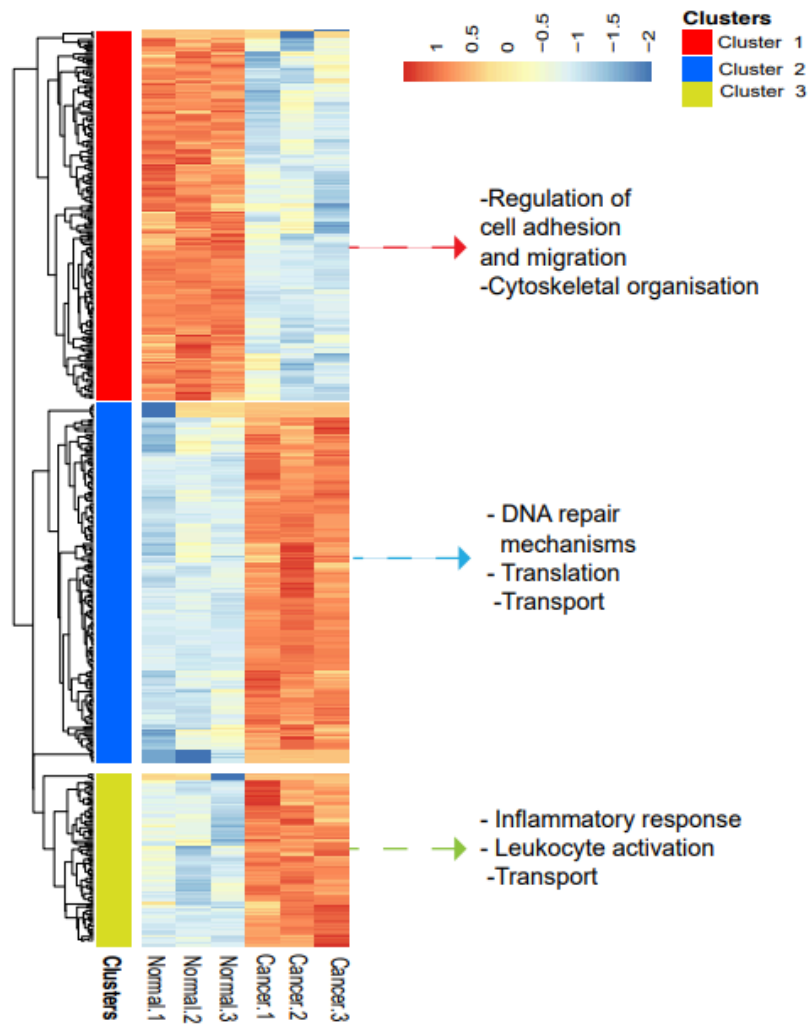

Supplementary figure S2: The cluster map depicting the hierarchical clustering of differentially expressed proteins and their associated biological process and pathways.

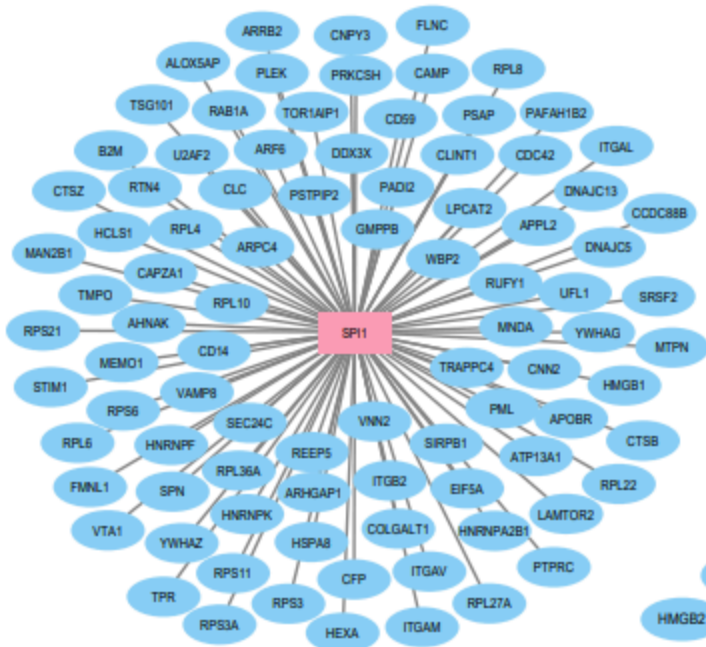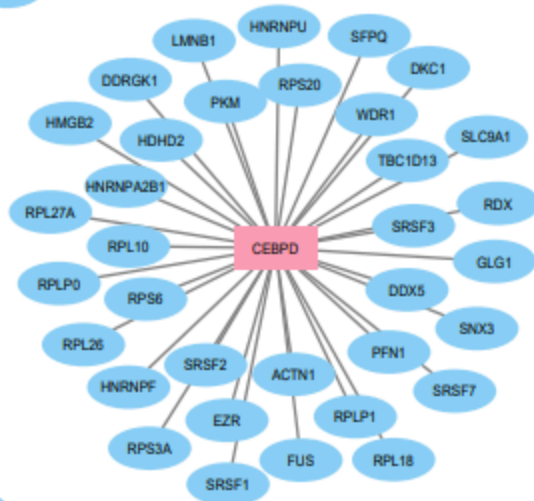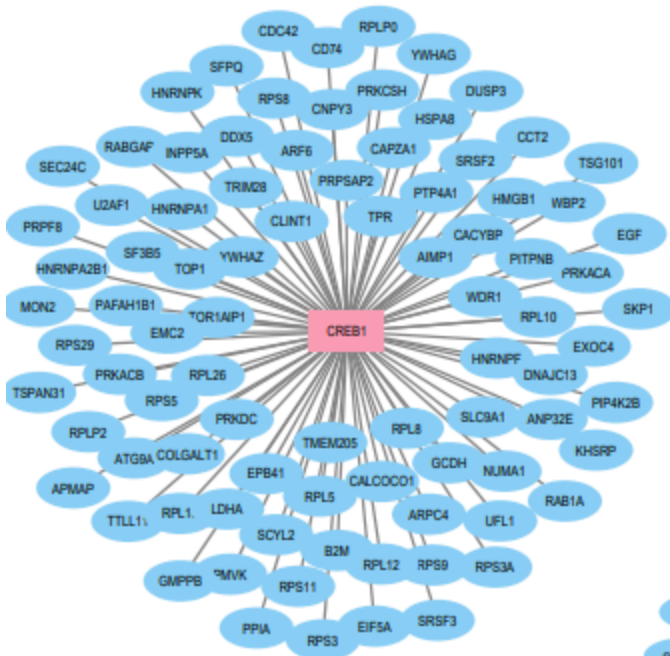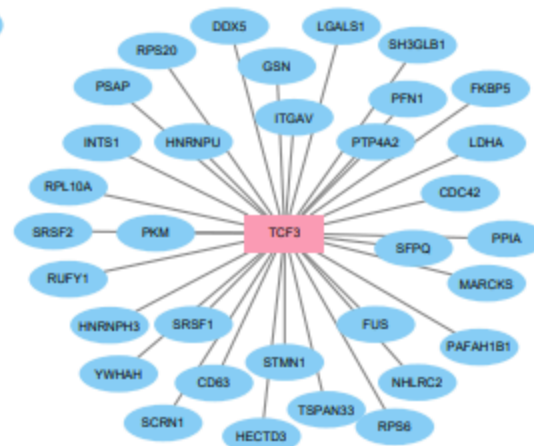

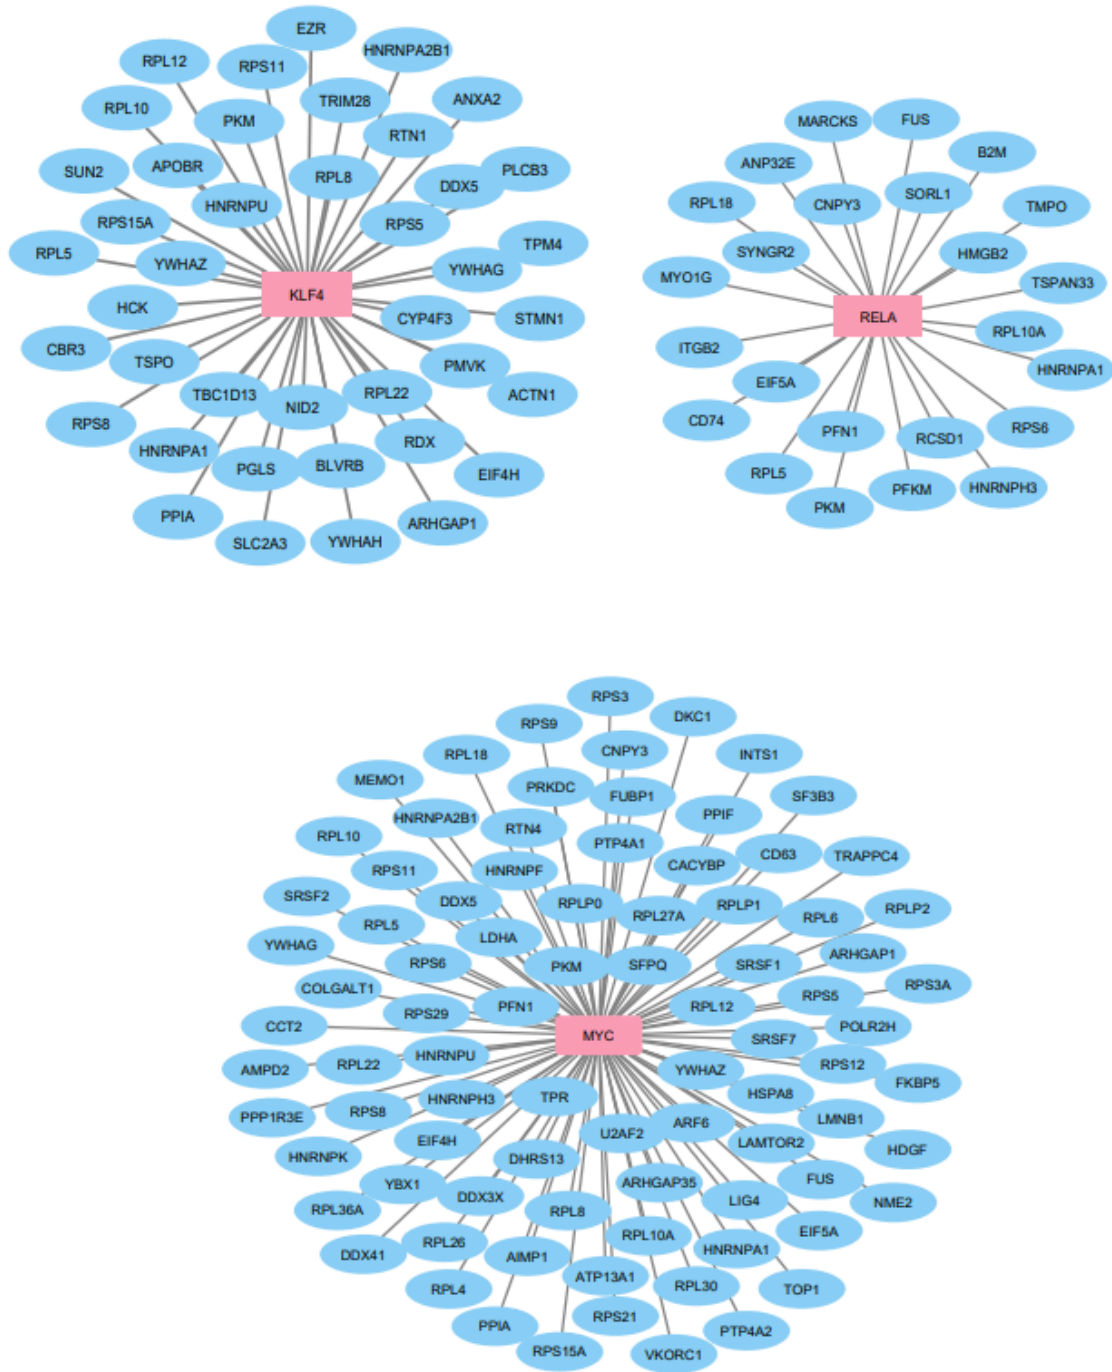

Supplementary figure S3 : The figure illustrates potential transcription factors enriched from differentially expressed proteins and their corresponding protein targets. The transcription factor is depicted in the center, surrounded by its associated protein targets.
