# Supplementary material for: Proteomic analysis of peripheral blood mononuclear cells from OSCC patients reveals potential immune checkpoints to enable personalized treatment
Source: Royal Society of Chemistry journal article supplement (doi:10.1039/d4mo00112e), 2024-08-23
Supplement: d4mo00112e2.xlsx [file d4mo00112e2.xlsx]

## Sheet: Sheet1
Supplementary table S1: List of differentially abundant proteins identified from the study Proteomic analysis of peripheral blood mononuclear cells from oral squamous cell carcinoma patients reveals potential immune checkpoints to enable personalized treatment
Proteins	FC	pvalue
FUCA1	1.50131	0.0150316
PRKDC	1.50171	0.00175461
MYO1G	1.50277	0.00673624
DEFA3	1.50285	0.00256965
RPL8	1.50365	0.00522284
SRPRB	1.50479	0.00512348
IFI30	1.50572	0.0208746
DEK	1.50854	0.0352097
MNDA	1.51562	0.00957863
DKC1	1.52211	0.0413769
LMNB2	1.52398	0.00274009
GCDH	1.52428	0.0230785
HP	1.52645	0.000470816
LGALS1	1.52959	0.00166454
ANP32E	1.53387	0.0202173
EPB41	1.53442	0.0334409
HSPB1	1.53854	0.00450968
RPS20	1.53936	0.00320208
HNRNPK	1.54141	0.0201488
DNAJC13	1.54298	0.0226078
RPL6	1.54305	0.0115521
RPLP2	1.54389	0.0298212
H3-7	1.54436	0.0085218
ANK1	1.54708	0.000428898
SKP1	1.54739	0.00519644
HEXA	1.54781	0.0339736
BLVRB	1.54843	0.000431053
NQO2	1.5502	0.0072871
ATG9A	1.5518	0.00909595
CD74	1.55205	0.00877552
GOLGA2	1.55305	0.0172698
IGHG2	1.55561	0.0133212
RPS3	1.55953	0.00239208
RPS4X	1.56215	0.00114969
APMAP	1.56785	0.00246028
HLA-DRB1	1.56806	0.00284999
HPX	1.56933	0.00438777
DBN1	1.57225	0.00917757
COX17	1.57426	0.00650489
DNAJC3	1.57683	0.0370508
HNRNPU	1.57927	0.00128148
STIM1	1.5793	0.00896152
CYP4F3	1.58104	0.00943269
LBR	1.58133	0.00056803
PEAR1	1.58431	0.00242053
SPN	1.58604	0.0345981
TGFB1I1	1.58745	0.00425997
AGTRAP	1.59993	0.0145362
UFL1	1.60273	0.0204158
CEACAM8	1.60541	0.0252092
HCK	1.60827	0.00885639
PRPF8	1.61498	0.0315059
NOMO1;NOMO2;NOMO3	1.61759	0.00193189
CAMP	1.61834	0.00726199
SORL1	1.62021	0.0228905
CD5	1.63521	0.0262389
CNPY3	1.6374	0.00607748
ANXA2	1.63789	0.00287157
ELANE	1.63916	0.0126651
FLOT2	1.64651	0.00326673
RPLP0	1.64847	0.0133591
SNRNP200	1.6503	0.0312355
LTF	1.65097	6.69595e-06
SF3B3	1.65611	0.00634555
MYO1F	1.66149	0.00466664
HNRNPA1	1.66371	0.0230033
ITGAL	1.66681	0.00766102
HNRNPM	1.66777	0.000712324
PTPRC	1.67215	0.000854016
GRN	1.67343	0.00295895
PRDX2	1.68108	0.000185753
RPS6KB1;RPS6KB2	1.68473	0.0136406
PRKCSH	1.68675	0.000976711
CTSG	1.69099	0.0028864
RPS3A	1.69395	0.00422182
HDGF	1.6951	0.00659633
H2BC18	1.69546	0.00555842
WASF2	1.69935	0.0130782
PGLYRP1	1.70114	0.00242418
GCA	1.70153	0.00280328
LMNB1	1.70223	0.00241346
FMNL1	1.70492	0.000750162
CES1	1.70593	0.0387706
H2BC26	1.70829	0.0097214
ARSA	1.71213	0.0399353
SLC4A1	1.71366	0.00433581
RPL5	1.71405	5.72363e-05
NONO	1.71803	0.0023678
PTX3	1.72483	0.00350969
RNF213	1.72488	0.00059702
BASP1	1.72508	0.00344683
SUN2	1.72546	0.0243442
RPS21	1.72855	0.000459517
RPS12	1.73088	0.0486834
CYFIP2	1.73224	0.00640504
MECP2	1.73287	0.0137326
CTSZ	1.73578	0.00191163
GZMK	1.74519	0.0026056
RPL10A	1.75163	0.0343189
H1-2	1.75687	0.0260602
HNRNPF	1.76125	0.00402797
PLBD1	1.76613	0.00165569
CD59	1.76763	0.00169033
RPS5	1.77223	0.0010733
RPL22	1.77226	0.00117335
GRK2	1.77775	0.00307506
GZMH	1.77785	0.0222501
GC	1.78153	0.00435296
VIM	1.78153	0.000683716
ADD3	1.79411	0.0399764
SEC61B	1.79949	0.0121067
RPL27A	1.81006	0.0301876
MACROH2A1	1.81395	0.000142115
REEP5	1.81574	0.0353384
MAN2B1	1.81716	0.0394697
MMP8	1.82157	0.000648308
SRSF7	1.82549	0.00210032
OLR1	1.84164	0.00148544
ITGAM	1.84346	1.53805e-05
MPO	1.84459	0.000126167
RPL18	1.84748	0.00274154
RPL12	1.84848	0.0246119
EIF4H	1.85181	0.0105163
IGHA1	1.86727	0.000937924
SYNGR2	1.86979	0.0352322
IGK	1.87301	0.000106314
CYBB	1.87355	0.0060472
AZU1	1.87958	0.00830299
HLA-DPA1	1.88234	0.0167787
H1-0	1.88436	0.00149143
RPS8	1.8876	0.034372
RPL26;RPL26L1	1.88853	9.06635e-05
LPCAT2	1.89392	0.00478173
ERO1A	1.8975	0.00552651
TMEM205	1.89839	0.0139652
CFP	1.90957	0.00057315
ATP13A1	1.91294	0.00468288
EPB42	1.91896	0.000933967
SRSF3	1.91919	0.000169964
SF3B5	1.92108	0.00342314
CRACR2B	1.93187	0.000428842
SIGLEC9	1.93601	0.00253543
HNRNPA2B1	1.94199	0.00102881
ALOX5AP	1.95058	0.000690366
HLA-DRA	1.95527	0.000122948
ALDH2	1.95616	0.000413958
RPS15A	1.95662	0.00124287
TMPO	1.96314	0.00978696
LAMP2	1.96427	0.0304974
PSAP	1.96955	0.00368281
FUBP1	1.97443	0.00476449
HVCN1	1.98316	0.000723874
SAPCD2	1.99125	0.0115694
RPL4	1.99817	0.0141111
EZR	2.00096	0.0264887
EML5	2.00293	0.0164867
U2AF2	2.017	0.0360649
SIRPB1	2.02242	0.0125325
HMGB1	2.02458	0.0192048
CPVL	2.02713	0.0378826
STING1	2.0334	0.00012869
DES	2.04173	0.03733
RPS9	2.04243	0.00165587
TOP1	2.04467	0.00355422
POLR2H	2.04866	0.0320942
FAM98B	2.05225	0.0368816
PRF1	2.05428	8.67019e-05
SFPQ	2.06311	0.0203344
SRSF2	2.06627	0.0104879
VNN2	2.07309	0.000642911
RAB27A	2.07446	0.00770189
HNRNPH3	2.07887	0.0157423
IGHV1-3;IGHV1-46;IGHV1-69;IGHV1-69D;IGHV1-8	2.07922	0.00858799
S100A10	2.08445	0.000966357
SAMHD1	2.09086	0.000625754
AHNAK	2.09315	8.44941e-05
EVL	2.10771	0.0318636
ALOX5	2.11222	0.000849096
H1-4	2.11757	0.000274703
RPL30	2.12282	0.0209021
PADI4	2.12971	0.000327053
CTSB	2.14854	0.0032024
APOBR	2.1549	0.000169054
RPS6	2.16121	0.0191036
IGHV3-7	2.20127	8.25975e-05
SCAMP2	2.22208	0.00284965
TOR1AIP1	2.22863	0.00444644
NUP93	2.2326	0.0173693
HBA1	2.24474	0.00409043
ITGB2	2.24732	1.97244e-05
RCSD1	2.25051	0.00440652
EIF5A	2.26126	0.000364732
RETN	2.26867	0.00103613
ICAM3	2.27862	0.0163992
SNCA	2.27933	0.0260027
RPL10;RPL10L	2.28254	0.0170426
HP1BP3	2.28388	0.000153923
SH3GLB1	2.29067	0.0442254
RPS11	2.29135	0.00246191
NPTN	2.29351	0.0420415
DNAJC5	2.29654	0.0475264
HCLS1	2.3039	0.033509
ARRB2	2.33925	0.000723063
SPTA1	2.34369	0.00250729
CROCC	2.35228	0.0062871
RPL36A;RPL36AL	2.35536	0.0226432
SRSF1	2.36504	0.00446016
FUS;TAF15	2.37111	0.00182931
NUMA1	2.37793	0.0203266
RSU1	2.38318	0.00153048
CYBA	2.38779	3.38818e-05
DDRGK1	2.43787	0.00289076
MGAM	2.45026	0.00752346
DDX5	2.49078	0.000374698
GZMA	2.49282	0.000208044
LITAF	2.50577	0.00266007
PML	2.51085	0.00930854
STMN1	2.52052	0.000188979
HMGB2	2.53412	0.00500899
IGHM	2.55425	1.09772e-05
VAMP8	2.55738	0.00963717
C4BPA	2.60349	0.00605408
ADGRE5	2.61075	0.0443981
TSPAN31	2.61447	0.00676686
KHSRP	2.6152	0.00315268
MARCKS	2.65183	6.41088e-06
OLFM4	2.67526	0.000173026
KNG1	2.68323	0.0140738
DYSF	2.69548	9.09398e-06
DEF6	2.72356	0.0093519
SLC35F6	2.74388	0.00762341
LNPK	2.75292	0.0125001
ADH7	2.7929	0.000899975
CKAP4	2.79986	5.5779e-05
CEACAM1	2.84842	0.00318606
GLG1	2.86704	0.0239357
VNN1	2.90266	0.00012153
H1-5	2.91988	0.0071949
IGKV2-28;IGKV2-29;IGKV2-30;IGKV2-40;IGKV2D-26;IGKV2D-28;IGKV2D-29;IGKV2D-30;IGKV2D-40	2.92653	0.000274989
HBB	2.99447	0.00148557
RPS29	3.02157	0.0361535
CLEC12A	3.06261	0.000360022
TK2	3.16729	0.000411397
SELENBP1	3.17592	0.0251415
CCDC88B	3.2227	0.000282031
LBP	3.25704	0.0348856
SSB	3.29109	0.0462379
APOC3	3.29556	0.00500047
SIGLEC5	3.29731	3.57024e-05
CA1	3.41019	0.00440511
CA4	3.43535	0.00251064
PSMF1	3.45317	0.0405178
TRIM28	3.46005	0.0322259
PRPS2	3.48828	0.0361119
HIDE1	3.49644	0.0195734
HBG1;HBG2	3.50197	3.7928e-05
MX1	3.52047	0.0261113
CHMP6	3.64423	0.0248269
CD177	3.69207	5.09599e-05
CD14	3.71182	0.00428064
ITGAX	3.7676	0.0138011
LTB4R	3.79518	0.000546707
YBX1	3.81323	0.000340901
ADAM8	3.91873	0.000426979
HBD	4.01875	2.87207e-06
JCHAIN	4.13707	0.0118575
A2M	4.14724	0.0134051
VKORC1	4.24068	0.0261469
CR1	4.29105	0.00767062
SSRP1	4.48401	0.0247361
MT1E;MT1G;MT1M;MT1X;MT2A	4.52387	0.0242751
FKBP5	4.63129	0.00809296
SNX3	4.6505	0.00611525
U2AF1	4.67994	0.0127763
GNLY	4.96811	0.000330109
ADGRG3	5.23741	0.00450743
CP	5.95201	0.000593025
GCN1	5.97617	0.00317919
COLGALT1	7.18472	0.00378898
LIG4	20.1123	0.000123083
GNA14	0.190631	4.65571e-06
RDX	0.247713	0.011069
TPR	0.253538	0.0119745
SPINK5;TRIM34	0.262028	0.00520356
PLXNA4	0.269408	0.00741449
EML3	0.281872	0.0243825
C1R	0.291669	0.00303083
RAB38	0.303729	0.0398922
ALOX15	0.310148	0.0447651
IFIT1	0.316459	0.0266589
CLC	0.327457	0.00869352
GNG8	0.337456	0.0409994
PKLR	0.353381	0.000221428
ITGA5	0.368403	0.00247921
RASA1	0.375997	0.00271316
EPHA7;EPHB2	0.377855	0.000167742
LAMTOR2	0.379378	0.00525135
SH3BGRL2	0.381915	0.00773403
ARF6	0.383693	0.00110616
RTN4	0.387952	0.00147477
SLC9A1	0.394466	0.0166089
FLNC	0.4034	7.49187e-06
PRKACB	0.427179	0.0177827
PAFAH1B2	0.437273	0.00262552
PEPD	0.437573	0.00314664
DHRS13	0.438144	0.00432388
ARR3	0.438453	0.0110752
EPDR1	0.441722	0.00801438
TTLL11	0.443404	1.72559e-05
CLDN5	0.446711	0.00384109
GSTM1	0.451999	0.00552763
MEMO1	0.469392	0.00347659
NECTIN2	0.470346	0.0126729
PACS1	0.472056	0.00253347
RNASE2	0.4752	1.91317e-05
RPLP1	0.477766	0.0416474
PLEK	0.478851	6.39592e-05
TRPC6	0.479212	0.0202489
GMPPA	0.482785	0.0126963
CALCOCO1	0.491444	0.00177876
NME2;NME2P1	0.491537	0.00207457
PRG2	0.491886	0.00130805
CRYL1	0.497793	0.0128381
CD151	0.501781	0.0123733
ISOC1	0.503453	0.0318433
TBC1D13	0.507933	4.23066e-06
ME1	0.510423	0.0218917
PKM	0.510727	0.0094126
TSPO	0.511691	3.54779e-05
YES1	0.512854	0.000987144
EGF	0.515061	0.0470249
QDPR	0.518243	0.00473991
NRGN	0.518529	0.00968983
LHFPL2	0.521223	0.0192221
RUFY1	0.528324	0.0132476
PADI2	0.532174	0.00223746
ARHGEF11	0.532862	0.00182959
MYH11	0.535593	0.0189283
HECTD3	0.541873	0.0358045
NHLRC2	0.543968	0.0177906
PRKG1	0.545327	0.0189976
SIAE	0.546594	0.00222733
RAB2A	0.547209	0.00923013
DUSP3	0.549991	0.00673006
PTP4A2	0.550139	0.000102164
PTP4A1	0.550692	0.000271804
GARS1	0.552251	0.0147972
RSU1	0.553549	0.00475626
SEPTIN11	0.553734	9.73019e-05
PYGM	0.55552	0.0194862
DDX41	0.556116	0.000509995
INTS1	0.556236	0.0337888
LACTB	0.557667	0.0080253
MON2	0.558651	0.0333076
SLC18A2	0.559644	0.0279143
PAFAH1B1	0.562652	0.00241506
EMC2	0.562892	0.0161851
CAPZA1	0.564363	0.000189213
PLCB3	0.566431	0.00937322
CDC42	0.566479	0.00821409
NID2	0.566785	0.00144487
SORD	0.566816	0.00881977
GNAQ	0.567148	0.00017949
TRAPPC4	0.57239	0.00335756
VTN	0.574039	4.15913e-05
CD9	0.577252	9.70773e-05
F5	0.578242	7.74691e-05
TANGO2	0.578637	0.0232003
EML2	0.579888	0.00799667
ARHGAP1	0.579977	0.00185694
PIP4K2B	0.584423	0.0450167
RAB27B	0.587841	0.00288156
AMPD2	0.587973	0.0011883
RTN1	0.588792	0.0230123
EPHX2	0.589713	0.00547871
HSP90AB3P	0.589895	0.000366799
PTPRB;PTPRO	0.594035	0.0182479
FGB	0.594344	2.01988e-05
SLC2A3	0.594474	0.00384185
APPL2	0.59459	0.00455199
HSPA6	0.599478	0.000387039
CLINT1	0.601707	0.00947257
PPIA	0.60217	0.00487138
GP1BB	0.60245	0.000627035
FLNA	0.603795	4.47894e-06
AGL	0.604336	0.0121566
MGLL	0.6055	0.00213473
AIMP1	0.606332	0.00548364
NAP1L1	0.606694	0.000499035
ARRB1	0.606706	0.000112018
CBR1	0.606795	0.0242374
CNN2	0.608201	0.00259515
PRG3	0.608338	0.000962638
MOB3C	0.608829	0.0205422
YWHAZ	0.609784	0.00052312
PITPNB	0.610129	0.0427562
PMVK	0.610563	0.00264637
SKAP2	0.610826	0.000454667
PPP1R3E	0.614096	0.00861511
HK1	0.615071	8.36986e-06
F13A1	0.61547	0.00104752
CHIT1	0.615726	0.00675372
FGG	0.617394	7.38358e-07
TSG101	0.617538	0.00177865
GRAP2	0.618071	0.0157112
PRKACA	0.618156	0.0384575
HDHD2	0.618812	0.0072794
INPP5A	0.619078	0.0347548
LDHA	0.620355	0.00197515
CLU	0.620671	0.000542407
WDR1	0.621178	1.22393e-06
ARHGAP35	0.621523	0.0348261
TSPAN33	0.622004	0.0467501
P2RY12	0.622299	0.0467069
MINDY1	0.622711	0.00227289
FGA	0.623814	0.000379178
MTPN	0.625522	0.016515
RAB1A	0.625871	0.0291849
PFKM	0.626222	0.0215688
SCYL2	0.6266	0.0150968
VTA1	0.626876	0.0165164
PRPSAP2	0.627076	0.00430843
CD63	0.627706	0.0334779
RAB13	0.627831	0.0429836
CCS	0.628599	0.00900887
TPM3	0.629788	0.00303083
TUBA8	0.63018	0.0179144
SCRN1	0.630518	0.047248
PRKCA	0.630645	0.000873759
PSTPIP2	0.631467	0.000800408
SRC	0.631722	0.00390921
TPM4	0.632994	0.00137558
UBE2L3	0.633149	0.0023315
B2M	0.633711	0.00342162
VPS51	0.633993	0.0379972
DDX3X	0.634606	0.0298401
TC2N	0.634683	0.0230375
CACYBP	0.634952	0.0304155
HSPA8	0.636017	5.97975e-05
DAAM1	0.636086	0.0386572
RAB14	0.636208	0.00187339
ITGAV	0.637352	0.00991794
YWHAG	0.637621	0.000189686
PGLS	0.638664	0.0290175
CBR3	0.639041	0.00934551
C1orf198	0.640181	0.0422196
ACTN1	0.640381	2.29083e-05
PPIF	0.640656	0.0114035
RABGAP1	0.640738	0.0137642
EXOC4	0.640976	0.0332287
CCT2	0.641354	0.000596344
LDHB	0.643944	0.00049039
GP9	0.644071	5.56326e-05
DNM1	0.644242	0.00478824
VCL	0.644708	1.0755e-05
GMPPB	0.644764	0.00434238
YWHAH	0.644926	9.19316e-05
ATP5MJ	0.645674	0.0124137
PPBP	0.646033	0.00420899
RGS18	0.646993	0.0168559
ITGA2	0.648859	0.00192339
SEC24C	0.650073	0.0191727
RAB10	0.65019	0.00287562
ARPC4	0.650249	0.00910013
KIAA0513	0.650485	0.0332512
HSPA1A;HSPA1B	0.651487	0.000200655
DNM1L	0.652135	0.000104644
LGALSL	0.65257	0.00362003
PFN1	0.653186	0.00438661
EPX	0.653947	0.0012368
RNASE3	0.653956	0.000707711
GSN	0.655397	0.000202415
H2AC21	0.656996	0.0117088
WBP2	0.657523	0.006034
FAM234A	0.657792	0.0241619
