# Supplementary material for: Proteomic analysis of peripheral blood mononuclear cells from OSCC patients reveals potential immune checkpoints to enable personalized treatment
Source: Royal Society of Chemistry journal article supplement (doi:10.1039/d4mo00112e), 2024-08-23
Supplement: d4mo00112e3.xlsx [file d4mo00112e3.xlsx]

## Sheet: Sheet1
Supplementary Table S2: The list of enriched pathways for the differentially abundant proteins identified
Pathway identifier	Pathway name	#Entities found	Entities ratio	Entities pValue	Entities FDR	#Reactions found	Species name	Submitted entities found	Mapped entities
R-HSA-6798695	Neutrophil degranulation	57	0.0311259	1.11e-16	1.28e-13	10	Homo sapiens	ITGAM;DDX3X;CTSZ;HP;SLC2A3;PYGM;EPX;ITGAL;MPO;OLR1;CTSG;ITGAV;PGLYRP1;B2M;CAMP;ARSA;CCT2;ANXA2;NME2;RNASE3;MMP8;RNASE2;CHIT1;DNAJC3;PKM;PADI2;CEACAM8;PPIA;VCL;PAFAH1B2;LTF;CD63;GRN;CNN2;CD59;ELANE;HSPA8;GSN;GCA;FUCA1;AGL;HSPA6;PRG2;DNAJC13;PPBP;PRG3;GZMH;RAB10;PTPRB;PTPRC;RAB14;LAMTOR2;PTX3;MNDA;MAN2B1;HSPA1A
R-HSA-1799339	SRP-dependent cotranslational protein targeting to membrane	25	0.00774891	5.44e-15	2.17e-12	5	Homo sapiens	RPL5;RPS5;RPLP1;RPL12;RPL22;RPLP0;RPS3A;RPL10A;RPL8;RPL6;RPS4X;RPL27A;RPS3;RPLP2;SRPRB;RPS20;SEC61B;RPL18;RPS21;RPS12
R-HSA-975956	Nonsense Mediated Decay (NMD) independent of the Exon Junction Complex (EJC)	23	0.0065768	1.31e-14	3.56e-12	1	Homo sapiens	RPL5;RPS5;RPLP1;RPL12;RPL22;RPLP0;RPS3A;RPL10A;RPL8;RPL6;RPS4X;RPL27A;RPS3;RPLP2;RPS20;RPL18;RPS21;RPS12
R-HSA-156842	Eukaryotic Translation Elongation	23	0.00664192	1.61e-14	3.56e-12	4	Homo sapiens	RPL5;RPS5;RPLP1;RPL12;RPL22;RPLP0;RPS3A;RPL10A;RPL8;RPL6;RPS4X;RPL27A;RPS3;RPLP2;RPS20;RPL18;RPS21;RPS12
R-HSA-72689	Formation of a pool of free 40S subunits	23	0.00690239	3.53e-14	5.08e-12	2	Homo sapiens	RPL5;RPS5;RPLP1;RPL12;RPL22;RPLP0;RPS3A;RPL10A;RPL8;RPL6;RPS4X;RPL27A;RPS3;RPLP2;RPS20;RPL18;RPS21;RPS12
R-HSA-168249	Innate Immune System	84	0.0873217	1.49e-13	1.31e-11	144	Homo sapiens	CYFIP2;ITGAM;DDX3X;PRKCSH;CTSZ;HP;SLC2A3;PYGM;DDX41;EPX;ITGAL;CLU;MPO;IGHG2;GRAP2;OLR1;CTSG;ITGAV;PRKACA;PGLYRP1;B2M;PRKACB;CAMP;SKP1;FGB;ARSA;FGA;CCT2;DUSP3;ANXA2;FGG;NME2;CNPY3;RNASE3;MMP8;RNASE2;DNM1;CHIT1;DNAJC3;HCK;PKM;PADI2;CEACAM8;PPIA;VCL;PAFAH1B2;LTF;CD63;GRN;PRKDC;SRC;C1R;CNN2;CDC42;VTN;CD59;WASF2;ELANE;HSPA8;YES1;GSN;GCA;FUCA1;AGL;HSPA6;PRG2;DEFA3;ARPC4;DNAJC13;PPBP;PRG3;GZMH;RAB10;PTP…
R-HSA-72613	Eukaryotic Translation Initiation	24	0.0084652	2.95e-13	2.02e-11	13	Homo sapiens	RPL5;RPS5;RPLP1;RPL12;RPL22;RPLP0;RPS3A;RPL10A;RPL8;RPL6;RPS4X;RPL27A;RPS3;EIF4H;RPLP2;RPS20;RPL18;RPS21;RPS12
R-HSA-168256	Immune System	131	0.173276	3.01e-13	2.02e-11	312	Homo sapiens	CYFIP2;HP;F13A1;IFIT1;IFI30;EPX;CLU;MPO;UBE2L3;IGHG2;GRAP2;PRKACA;PGLYRP1;B2M;PRKACB;SKP1;ARSA;CNPY3;RNASE3;RNASE2;CHIT1;STIM1;PADI2;PPIA;VCL;CES1;PRKDC;ALOX15;CNN2;VTN;RNF213;TPR;ELANE;HSPA8;YES1;FUCA1;HSPA6;PRG2;DEFA3;DNAJC13;ARPC4;PPBP;PRG3;PTPRB;PTPRC;HNRNPF;MAN2B1;HLA-DRB1;TUBA8;DDX3X;ITGAM;PRKCSH;RPLP0;CTSZ;SLC2A3;PYGM;DDX41;ITGAL;LMNB1;UFL1;OLR1;CTSG;ITGAV;SEC61B;PRKG1;CAMP;FGB;FGA;CCT2;DU…
R-HSA-927802	Nonsense-Mediated Decay (NMD)	23	0.00807449	8.45e-13	4.82e-11	5	Homo sapiens	RPL5;RPS5;RPLP1;RPL12;RPL22;RPLP0;RPS3A;RPL10A;RPL8;RPL6;RPS4X;RPL27A;RPS3;RPLP2;RPS20;RPL18;RPS21;RPS12
R-HSA-975957	Nonsense Mediated Decay (NMD) enhanced by the Exon Junction Complex (EJC)	23	0.00807449	8.45e-13	4.82e-11	4	Homo sapiens	RPL5;RPS5;RPLP1;RPL12;RPL22;RPLP0;RPS3A;RPL10A;RPL8;RPL6;RPS4X;RPL27A;RPS3;RPLP2;RPS20;RPL18;RPS21;RPS12
R-HSA-8950505	Gene and protein expression by JAK-STAT signaling after Interleukin-12 stimulation	16	0.00475353	2.47e-10	9.62e-09	8	Homo sapiens	CNN2;CDC42;ANXA2;CAPZA1;HNRNPF;RPLP0;PPIA;LMNB1
R-HSA-9020591	Interleukin-12 signaling	16	0.00546982	1.79e-09	6.44e-08	8	Homo sapiens	CNN2;CDC42;ANXA2;CAPZA1;HNRNPF;RPLP0;PPIA;LMNB1
R-HSA-6791226	Major pathway of rRNA processing in the nucleolus and cytosol	23	0.0123071	2.86e-09	9.74e-08	3	Homo sapiens	RPL5;RPS5;RPLP1;RPL12;RPL22;RPLP0;RPS3A;RPL10A;RPL8;RPL6;RPS4X;RPL27A;RPS3;RPLP2;RPS20;RPL18;RPS21;RPS12
R-HSA-447115	Interleukin-12 family signaling	16	0.00625122	1.14e-08	3.64e-07	8	Homo sapiens	CNN2;CDC42;ANXA2;CAPZA1;HNRNPF;RPLP0;PPIA;LMNB1
R-HSA-72766	Translation	28	0.0220746	1.98e-07	5.56e-06	36	Homo sapiens	RPL5;RPS5;RPLP1;RPL12;RPL22;RPLP0;RPS3A;RPL10A;RPL8;RPL6;RPS4X;AIMP1;GARS1;RPL27A;RPS3;EIF4H;RPLP2;SRPRB;RPS20;SEC61B;RPL18;RPS21;RPS12
R-HSA-3371568	Attenuation phase	9	0.00306049	6.23e-06	0.000168	3	Homo sapiens	HSPA8;HSPA6;HSPB1;HSPA1A
R-HSA-1280215	Cytokine Signaling in Immune system	53	0.0716937	2.34e-05	0.000539	69	Homo sapiens	ITGAM;SRC;ALOX15;RPLP0;F13A1;IFIT1;IFI30;LMNB1;CNN2;CDC42;GRAP2;TPR;FLNA;CTSG;PRKACA;B2M;SKP1;HSPA8;YES1;DUSP3;ANXA2;YWHAZ;GZMH;DNAJC3;HCK;CAPZA1;HNRNPF;VIM;CLC;PPIA;HLA-DRB1;TUBA8;HSPA1A;CES1
R-HSA-199991	Membrane Trafficking	37	0.0434981	2.69e-05	0.000593	106	Homo sapiens	RAB1A;RABGAP1;TSG101;SRC;CTSZ;ARRB1;CLINT1;GOLGA2;GRK2;VPS51;TBC1D13;CD59;YWHAG;YWHAH;HSPA8;EGF;VTA1;TRAPPC4;ARPC4;RAB27B;YWHAZ;ANK1;DNM1;F5;RAB10;RAB14;CAPZA1;RAB13;EXOC4;RAB38;CLC;SEC24C;PAFAH1B2;TUBA8;ARF6;PAFAH1B1
R-HSA-449147	Signaling by Interleukins	35	0.0428469	9.83e-05	0.00196504	28	Homo sapiens	HSPA8;YES1;DUSP3;ITGAM;ANXA2;ALOX15;RPLP0;F13A1;YWHAZ;LMNB1;GZMH;CNN2;CDC42;HCK;CAPZA1;HNRNPF;CTSG;VIM;CLC;PRKACA;PPIA;SKP1
R-HSA-216083	Integrin cell surface interactions	10	0.00560005	0.000128	0.00242812	31	Homo sapiens	FGB;FGA;VTN;ITGAM;ITGA2;FGG;ITGAV;ITGA5;ITGAL
R-HSA-5674135	MAP2K and MAPK activation	7	0.00319073	0.000393	0.00629212	10	Homo sapiens	FGB;FGA;SRC;FGG;LAMTOR2;ARRB1;VCL
R-HSA-9725370	Signaling by ALK fusions and activated point mutants	8	0.00429771	0.000455	0.0072746	7	Homo sapiens	MECP2;RNF213;TPM4;TPM3;TPR;VCL;SKP1
R-HSA-9700206	Signaling by ALK in cancer	8	0.00429771	0.000455	0.0072746	7	Homo sapiens	MECP2;RNF213;TPM4;TPM3;TPR;VCL;SKP1
R-HSA-392517	Rap1 signalling	5	0.00156281	0.000509	0.00763373	3	Homo sapiens	PRKACA;YWHAZ;PRKACB;PRKG1
R-HSA-1474244	Extracellular matrix organization	20	0.0213583	0.000618	0.00864951	73	Homo sapiens	FGB;FGA;ITGAM;CD151;ITGA2;TRAPPC4;ACTN1;FGG;PRG2;PRKCA;ITGAL;MMP8;NID2;GZMH;VTN;ITGAV;CTSG;ITGA5;CEACAM8;PRKACA;ELANE
R-HSA-75035	Chk1/Chk2(Cds1) mediated inactivation of Cyclin B:Cdk1 complex	4	0.000977	0.000757	0.0105173	1	Homo sapiens	YWHAZ;YWHAG;YWHAH
R-HSA-4420097	VEGFA-VEGFR2 Pathway	11	0.00840008	0.000809	0.0105173	38	Homo sapiens	CYFIP2;CDC42;SRC;RASA1;HSPB1;PRKCA;ITGAV;PRKACA;PRKACB;WASF2
R-HSA-70171	Glycolysis	10	0.00729309	0.000982	0.01179	5	Homo sapiens	PKM;PKLR;TPR;PRKACA;PRKACB;PFKM;HK1
R-HSA-6802948	Signaling by high-kinase activity BRAF mutants	6	0.00286514	0.00128495	0.0154193	4	Homo sapiens	FGB;FGA;SRC;FGG;ARRB1;VCL
R-HSA-194138	Signaling by VEGF	11	0.00911636	0.00154161	0.0169578	38	Homo sapiens	CYFIP2;CDC42;SRC;RASA1;HSPB1;PRKCA;ITGAV;PRKACA;PRKACB;WASF2
R-HSA-111447	Activation of BAD and translocation to mitochondria	4	0.00123722	0.00179289	0.0197218	2	Homo sapiens	YWHAZ;YWHAG;YWHAH
R-HSA-446353	Cell-extracellular matrix interactions	4	0.00123722	0.00179289	0.0197218	3	Homo sapiens	ACTN1;FLNA;RSU1;FLNC
R-HSA-9656223	Signaling by RAF1 mutants	6	0.00319073	0.00219619	0.0219619	5	Homo sapiens	FGB;FGA;SRC;FGG;ARRB1;VCL
R-HSA-373760	L1CAM interactions	10	0.0084652	0.00288121	0.0288121	24	Homo sapiens	HSPA8;SRC;ITGA2;RDX;ITGAV;CLC;ITGA5;ANK1;DNM1;TUBA8
R-HSA-372708	p130Cas linkage to MAPK signaling for integrins	4	0.00143257	0.00302898	0.0302898	3	Homo sapiens	FGB;FGA;SRC;FGG
R-HSA-9007101	Rab regulation of trafficking	10	0.00853031	0.00304003	0.0304003	9	Homo sapiens	RAB10;RAB1A;RABGAP1;RAB14;TRAPPC4;RAB13;TBC1D13;RAB27B;RAB38;ARF6
R-HSA-9649948	Signaling downstream of RAS mutants	6	0.00351631	0.00352621	0.0317359	5	Homo sapiens	FGB;FGA;SRC;FGG;ARRB1;VCL
R-HSA-6802955	Paradoxical activation of RAF signaling by kinase inactive BRAF	6	0.00351631	0.00352621	0.0317359	5	Homo sapiens	FGB;FGA;SRC;FGG;ARRB1;VCL
R-HSA-6802946	Signaling by moderate kinase activity BRAF mutants	6	0.00351631	0.00352621	0.0317359	5	Homo sapiens	FGB;FGA;SRC;FGG;ARRB1;VCL
R-HSA-6802949	Signaling by RAS mutants	6	0.00351631	0.00352621	0.0317359	5	Homo sapiens	FGB;FGA;SRC;FGG;ARRB1;VCL
R-HSA-6802952	Signaling by BRAF and RAF1 fusions	7	0.00475353	0.00374626	0.0337164	5	Homo sapiens	FGB;FGA;SRC;FGG;AGTRAP;ARRB1;VCL
R-HSA-2132295	MHC class II antigen presentation	10	0.00892101	0.00414543	0.0373089	25	Homo sapiens	CD74;CAPZA1;CLC;IFI30;B2M;SEC24C;HLA-DRB1;DNM1;TUBA8
R-HSA-354192	Integrin signaling	5	0.00253956	0.00418046	0.0376242	19	Homo sapiens	FGB;FGA;SRC;FGG
R-HSA-202733	Cell surface interactions at the vascular wall	15	0.016735	0.00424623	0.038216	15	Homo sapiens	CD74;ITGAM;YES1;SRC;PPBP;ITGAL;SPN;OLR1;ITGAV;ITGA5;CEACAM8;IGHA1;PPIA
R-HSA-70326	Glucose metabolism	10	0.00931171	0.00554652	0.0443722	5	Homo sapiens	PKM;PKLR;TPR;PRKACA;PRKACB;PFKM;HK1
R-HSA-69473	G2/M DNA damage checkpoint	7	0.00520935	0.00608802	0.0487042	3	Homo sapiens	H2BC12;H2BC26;YWHAZ;YWHAG;YWHAH
R-HSA-3000171	Non-integrin membrane-ECM interactions	6	0.00397213	0.00628895	0.0503116	7	Homo sapiens	VTN;TRAPPC4;ITGA2;ACTN1;PRKCA;ITGAV;PRKACA
R-HSA-6802957	Oncogenic MAPK signaling	7	0.00605587	0.013106	0.0786361	29	Homo sapiens	FGB;FGA;SRC;FGG;AGTRAP;ARRB1;VCL
R-HSA-75153	Apoptotic execution phase	5	0.00351631	0.015476	0.0928561	8	Homo sapiens	GSN;VIM;DNM1L;H1-2;LMNB1
R-HSA-389356	CD28 co-stimulation	4	0.00266979	0.0247722	0.123861	4	Homo sapiens	CDC42;YES1;SRC;GRAP2
R-HSA-1280218	Adaptive Immune System	35	0.0607541	0.0264771	0.132386	105	Homo sapiens	SRC;ITGAL;IFI30;UBE2L3;CDC42;UFL1;RNF213;HECTD3;GRAP2;ITGAV;SEC61B;PRKACA;B2M;PRKACB;PRKG1;SKP1;FGB;FGA;CD74;YES1;FGG;YWHAZ;DNM1;PTPRC;STIM1;CAPZA1;CLC;SEC24C;PPIA;HLA-DRB1;NECTIN2;TUBA8
R-HSA-6785807	Interleukin-4 and Interleukin-13 signaling	11	0.0137397	0.0274638	0.137319	4	Homo sapiens	HSPA8;ITGAM;ALOX15;F13A1;VIM
R-HSA-109606	Intrinsic Pathway for Apoptosis	5	0.00416748	0.0293308	0.137906	3	Homo sapiens	YWHAZ;YWHAG;GZMH;YWHAH
R-HSA-70221	Glycogen breakdown (glycogenolysis)	3	0.00162792	0.0298069	0.137906	10	Homo sapiens	AGL;PYGM
R-HSA-388841	Costimulation by the CD28 family	6	0.00566517	0.0301767	0.137906	7	Homo sapiens	CDC42;YES1;SRC;GRAP2;HLA-DRB1
R-HSA-1500931	Cell-Cell communication	9	0.0107443	0.0342876	0.137906	14	Homo sapiens	CLDN5;CD151;SRC;ACTN1;FLNA;RSU1;FLNC;NECTIN2;SKAP2
R-HSA-109581	Apoptosis	10	0.0125676	0.0357174	0.142869	11	Homo sapiens	GSN;VIM;DNM1L;YWHAZ;YWHAG;GZMH;H1-2;YWHAH;LMNB1
R-HSA-1227986	Signaling by ERBB2	5	0.00442795	0.0365315	0.146126	24	Homo sapiens	YES1;SRC;EGF;PRKCA;MEMO1;PRKACA
R-HSA-2559586	DNA Damage/Telomere Stress Induced Senescence	5	0.00455818	0.0405049	0.162019	2	Homo sapiens	H2BC12;H2BC26;H1-2;LMNB1
R-HSA-190873	Gap junction degradation	2	0.000781	0.0411459	0.164584	4	Homo sapiens	CLC;DNM1
R-HSA-264870	Caspase-mediated cleavage of cytoskeletal proteins	2	0.000781	0.0411459	0.164584	4	Homo sapiens	GSN;VIM
R-HSA-512988	Interleukin-3, Interleukin-5 and GM-CSF signaling	4	0.00325584	0.0456984	0.182794	6	Homo sapiens	HCK;YES1;PRKACA;YWHAZ
R-HSA-9645723	Diseases of programmed cell death	6	0.00631634	0.0468162	0.187265	4	Homo sapiens	H2BC12;GOLGA2;PRDX2;H2BC26;LMNB1
R-HSA-5621575	CD209 (DC-SIGN) signaling	3	0.00195351	0.0468282	0.187313	1	Homo sapiens	PRKACA;PRKACB
R-HSA-877300	Interferon gamma signaling	9	0.0115257	0.0493631	0.197452	2	Homo sapiens	IFI30;B2M;HLA-DRB1;CES1
R-HSA-5218921	VEGFR2 mediated cell proliferation	3	0.00201862	0.0506985	0.202794	6	Homo sapiens	SRC;RASA1;PRKCA;PRKACA
R-HSA-446728	Cell junction organization	7	0.00820473	0.0534209	0.202967	10	Homo sapiens	CLDN5;CD151;ACTN1;FLNA;RSU1;FLNC;NECTIN2
R-HSA-9635465	Suppression of apoptosis	2	0.000912	0.0541191	0.202967	2	Homo sapiens	RNF213;CTSG;GZMH
R-HSA-9734009	Defective Intrinsic Pathway for Apoptosis	3	0.00214886	0.0588873	0.202967	3	Homo sapiens	GOLGA2;PRDX2;LMNB1
R-HSA-9664422	FCGR3A-mediated phagocytosis	8	0.0102234	0.0610049	0.202967	25	Homo sapiens	CYFIP2;CDC42;HCK;YES1;IGHG2;SRC;ARPC4;WASF2
R-HSA-5693571	Nonhomologous End-Joining (NHEJ)	4	0.00364655	0.0637767	0.202967	13	Homo sapiens	H2BC12;H2BC26;PRKDC
R-HSA-157858	Gap junction trafficking and regulation	4	0.00371166	0.0671056	0.202967	10	Homo sapiens	SRC;CLC;DNM1;TUBA8
R-HSA-1592389	Activation of Matrix Metalloproteinases	3	0.00227909	0.0676558	0.202967	4	Homo sapiens	CTSG;MMP8;ELANE;GZMH
R-HSA-177929	Signaling by EGFR	4	0.00397213	0.0812968	0.24389	43	Homo sapiens	CDC42;SRC;EGF
R-HSA-111465	Apoptotic cleavage of cellular proteins	3	0.00247444	0.0818424	0.245527	5	Homo sapiens	GSN;VIM;LMNB1
R-HSA-9613829	Chaperone Mediated Autophagy	2	0.00149769	0.125459	0.286729	12	Homo sapiens	HSPA8;VIM
R-HSA-1236975	Antigen processing-Cross presentation	6	0.00833496	0.128694	0.286729	10	Homo sapiens	FGB;FGA;FGG;ITGAV;SEC61B;B2M
R-HSA-389513	CTLA4 inhibitory signaling	2	0.00162792	0.143365	0.286729	2	Homo sapiens	YES1;SRC
R-HSA-2029480	Fcgamma receptor (FCGR) dependent phagocytosis	8	0.0125676	0.145728	0.291456	31	Homo sapiens	CYFIP2;CDC42;HCK;YES1;IGHG2;SRC;ARPC4;WASF2
R-HSA-5218859	Regulated Necrosis	4	0.00494888	0.145903	0.291807	8	Homo sapiens	FLOT2;ELANE;GZMH;UBE2L3
R-HSA-9710421	Defective pyroptosis	3	0.00332096	0.155469	0.310939	1	Homo sapiens	H2BC12;H2BC26
R-HSA-9612973	Autophagy	7	0.0108094	0.156548	0.313095	30	Homo sapiens	HSPA8;TSG101;SRC;ATG9A;LAMTOR2;VIM;TUBA8
R-HSA-168898	Toll-like Receptor Cascades	8	0.0131536	0.173073	0.328815	24	Homo sapiens	FGB;FGA;ITGAM;DUSP3;FGG;CNPY3;DNM1;SKP1
R-HSA-1632852	Macroautophagy	6	0.00976753	0.211775	0.328815	16	Homo sapiens	HSPA8;SRC;ATG9A;LAMTOR2;VIM;TUBA8
R-HSA-389948	PD-1 signaling	2	0.00214886	0.218968	0.328815	1	Homo sapiens	HLA-DRB1
R-HSA-5620971	Pyroptosis	2	0.00221397	0.228686	0.328815	2	Homo sapiens	ELANE;GZMH
R-HSA-73929	Base-Excision Repair, AP Site Formation	3	0.00403725	0.22872	0.328815	6	Homo sapiens	H2BC12;H2BC26
R-HSA-202403	TCR signaling	5	0.00879078	0.290658	0.328815	19	Homo sapiens	PTPRC;GRAP2;HLA-DRB1;SKP1
R-HSA-1236973	Cross-presentation of particulate exogenous antigens (phagosomes)	1	0.000847	0.292152	0.328815	2	Homo sapiens	ITGAV
R-HSA-983170	Antigen Presentation: Folding, assembly and peptide loading of class I MHC	2	0.00266979	0.297085	0.328815	12	Homo sapiens	B2M;SEC24C
R-HSA-5693606	DNA Double Strand Break Response	3	0.00488377	0.321309	0.328815	29	Homo sapiens	H2BC12;H2BC26
R-HSA-157579	Telomere Maintenance	4	0.00703262	0.323412	0.328815	13	Homo sapiens	H2BC12;H2BC26;DKC1
R-HSA-9646399	Aggrephagy	2	0.00306049	0.355028	0.355028	4	Homo sapiens	VIM;TUBA8
R-HSA-6788467	IL-6-type cytokine receptor ligand interactions	1	0.00110699	0.363583	0.363583	4	Homo sapiens	CLC
